# Supplementary material
Source: publisher site journal article supplement (https://www.dovepress.com/article/511449)
Supplement: Supplementary file 1 [file get_supplementary_file.php]

**Supplementary Appendix**

**Introduction for Tipping point analysis**

**Supplementary Methods.** Search terms

**Figure S1.** Flow Diagram of the Search for Published Studies

**Table S1.** Characteristics of included studies

**Figure S2**. Correlation analysis of missing rate with inconsistency rate, tipping-point SES and tipping-point ratio of the H0 rejected comparisons

**Table S2.** Multivariable Generalized Linear Regression analysis of study characteristics of all included studies

**Figure S3.** Correlation analysis of inconsistency rate, tipping-point SES, tipping distance and tipping ratio of the H0 rejected comparisons

**R code for inconsistency rate**

**Reference**

**Introduction for Tipping point analysis**

1. Tipping Points for Continuous Data.

Assume that smaller value corresponds to better effectiveness. We consider that the missing data has the same variance with the observed data of each group. and , where is the variance of the missing data in the treatment group, is the variance of the observed data in the treatment group, is the variance of the missing data in the control group, is the variance of the observed data in the control group.

We used 5 steps to calculate the tipping point.

Step 1: Let *k* = 0.

Step 2: Let *,* and

Step 3: Calculate , , , and *Z*, where *Z* is the test statistic according to either superiority or non-inferiority comparison.

Step 4: If , then , where is the upper level of the standard normal distribution.

Step 5: Repeat steps (2) to (4) till . The resulting difference of and is the tipping point.

, when .

1. Tipping Points for Binary Data.

Assume that smaller value corresponds to better effectiveness. Let and be the number of

missing values in the treatment and control group, respectively. Starting at 0 and ending at , the failure rate in the treatment group is changed by adding 1 failure at a time; meanwhile, the failure rate in the control group is changed by adding 1 failure at a time starting at 0 and ending at . The Z test statistics can be produced. If it is greater than or equal to , the difference of the resulting failure events between the two arms in the missing patients is a tipping point. The algorithm is as follows.

Step 1: Let = 0.

Step 2: Let = 0.

Step 3: Let *,* and

Step 4: Calculate , , , and *Z*, where *Z* is the test statistic according to either superiority or non-inferiority comparison.

Step 5: If , then , where

Step 6: Repeat steps (3) to (5) till . The resulting difference in event numbers between treatment groups in the missing cohort is a tipping point.

Step 7: , where Continue steps (2) to (6).

, when .

**Supplementary Methods.** Search terms

**PubMed**

(((coated[Title/Abstract] OR eluting[Title/Abstract]) AND (balloon[Title/Abstract] OR stent[Title/Abstract])) AND (superiority OR noninferiority) AND coronary[Title/Abstract] AND (Angiographic OR "late lumen loss" OR "late loss" OR "late luminal loss" OR "minimal lumen diameter" OR "minimal luminal diameter" OR "diameter stenosis") ) NOT protocol[Title/Abstract]

**Clinical trial.gov**

 (coated OR eluting) AND (balloon OR stent) AND coronary AND Angiographic | Completed Studies | Studies With Results

**Cochrane library**

 (coated OR eluting) AND (balloon OR stent) AND coronary (Angiographic OR "late lumen loss" OR "late loss" OR "late luminal loss" OR "minimal lumen diameter" OR "minimal luminal diameter" OR "diameter stenosis") AND (superiority OR noninferiority)

**Web of science**

(((coated OR eluting) AND (balloon OR stent)) AND (superiority OR noninferiority) AND coronary AND (Angiographic OR "late lumen loss" OR "late loss" OR "late luminal loss" OR "minimal lumen diameter" OR "minimal luminal diameter" OR "diameter stenosis")) NOT protocol


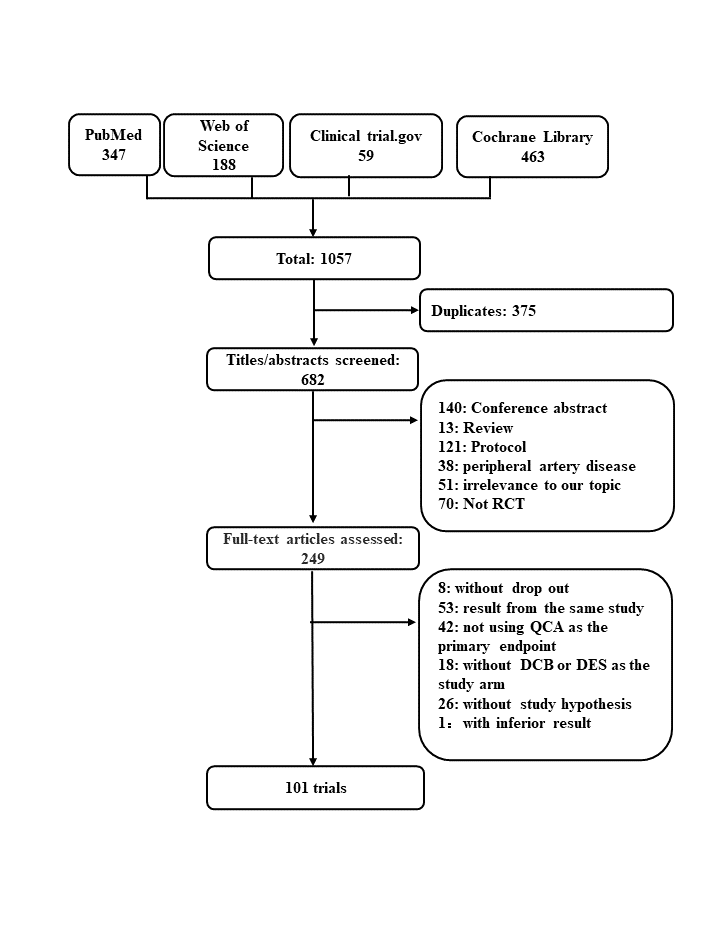
**Figure S1. Flow Diagram of the Search for Published Studies**

Abbreviation: DCB, drug-coated balloons; DES, drug-eluting stents; QCA, quantitative coronary angiography; RCT, randomized controlled trial.

Table S1. Characteristics of included studies

| First author, year | Study design | Interventions | N (Treatment) | N (Control) | Missing rate | Primary outcome | |
| --- | --- | --- | --- | --- | --- | --- | --- |
| With DES and DCB arm | | | | | | | |
| Unverdorben2009 | superiority | DCB vs DES | 66 | 65 | 0.11 | 6m | LLL |
| Ali2011 | superiority | DCB vs DES | 45 | 39 | 0.11 | 9m | LLL |
| Latib2012 | noninferiority | DCB vs DES | 94 | 98 | 0.15 | 6m | LLL |
| Byrne2013 | noninferiority | DCB vs DES | 172 | 168 | 0.15 | 6-8m | %DS |
| Alfonso2014 | superiority | DES vs DCB | 94 | 95 | 0.10 | 9m | MLD |
| Xu2014 | noninferiority | DCB vs DES | 113 | 108 | 0.18 | 9m | LLL |
| Alfonso2015 | superiority | DES vs DCB | 154 | 155 | 0.12 | 6-9m | MLD |
| Pleva2016 | noninferiority | DCB vs DES | 74 | 74 | 0.07 | 12m | LLL |
| Baan2018 | noninferiority | DCB vs DES | 137 | 141 | 0.21 | 6m | MLD |
| Jensen2018 | noninferiority | DCB vs DES | 163 | 80 | 0.23 | 6m | LLL |
| Tang2018 | noninferiority | DCB vs DES | 116 | 114 | 0.16 | 9m | %DS |
| Wong2018 | superiority | DCB vs DES | 86 | 86 | 0.57 | 9m | LLL |
| Cortese2020 | noninferiority | DCB vs DES | 118 | 114 | 0.10 | 6m | LLL |
| Yu2021 | noninferiority | DCB vs DES | 84 | 79 | 0.07 | 9m | LLL |
| Yu2022 | noninferiority | DCB vs DES | 85 | 85 | 0.11 | 9m | LLL |
|  |  |  |  |  |  |  |  |
| Mínguez2014 | noninferiority | DCB+BMS vs DES | 52 | 56 | 0.20 | 9m | LLL |
| Poerner2014 | noninferiority | DCB+BMS vs DES | 54 | 51 | 0.18 | 6m | Uncovered struts % |
| ZURAKOWSKI2015 | noninferiority | DCB+BMS vs DES | 102 | 100 | 0.54 | 9m | LLL |
| Chae2017 | noninferiority | DCB+BMS vs DES | 90 | 90 | 0.19 | 9m | LLL |
| Mínguez2014 | noninferiority | DCB+BMS vs DES | 52 | 56 | 0.20 | 9m | LLL |
|  |  |  |  |  |  |  |  |
| With DES arm |  |  |  |  |  |  |  |
| Morice2006 | superiority | DES vs DES | 970 | 941 | 0.08 | 8m | Restenosis |
| Petronio2007 | superiority | DES vs DES | 50 | 50 | 0.15 | 9m | Mean neointimal hyperplasia area |
| Chevalier2008 | noninferiority | DES vs DES | 199 | 197 | 0.13 | 9m | LLL |
| Mehilli2008 | noninferiority | DES vs DES | 239 | 242 | 0.18 | 6-8m | LLL |
| Mehilli2008 | noninferiority | DES vs DES | 231 | 242 | 0.20 | 6-8m | LLL |
| Stone2008 | noninferiority | DES vs DES | 376 | 188 | 0.23 | 8m | LLL |
| Chevalier2009 | noninferiority | DES vs DES | 174 | 98 | 0.19 | 9m | LLL |
| Herdeg2009 | noninferiority | DES vs DES | 67 | 67 | 0.19 | 6m | LLL |
| Juwana2009 | superiority | DES vs DES | 196 | 201 | 0.31 | 9m | LLL |
| Maeng2009 | superiority | DES vs DES | 76 | 77 | 0.15 | 8m | LLL |
| Verheye2009 | noninferiority | DES vs DES | 97 | 49 | 0.06 | 6m | LLL |
| Ormiston2010 | noninferiority | DES vs DES | 202 | 192 | 0.11 | 6m | LLL |
| Desch2011 | noninferiority | DES vs DES | 120 | 116 | 0.21 | 9m | LLL |
| Kim2011 | noninferiority | DES vs DES | 149 | 151 | 0.28 | 8m | LLL |
| Lee2011 | noninferiority | DES vs DES | 55 | 56 | 0.03 | 8m | LLL |
| Park2011 | noninferiority | DES vs DES | 224 | 226 | 0.19 | 9m | LLL |
| Pilgrim2011 | noninferiority | DES vs DES | 229 | 222 | 0.21 | 6-8m | LLL |
| Xu2011 | superiority | DES vs DES | 216 | 186 | 0.25 | 8m | LLL |
| Park2011' | noninferiority | DES vs DES | 1079 | 364 | 0.36 | 9m | LLL |
| Ahn2012 | noninferiority | DES vs DES | 250 | 250 | 0.32 | 9m | LLL |
| Carrié2012 | noninferiority | DES vs DES | 181 | 184 | 0.13 | 6m | LLL |
| Chung2012 | superiority | DES vs DES | 61 | 61 | 0.21 | 9m | LLL |
| Grube2012 | noninferiority | DES vs DES | 298 | 140 | 0.18 | 9m | LLL |
| Meredith2012 | noninferiority | DES vs DES | 92 | 98 | 0.04 | 6m | LLL |
| Meredith2012 | noninferiority | DES vs DES | 99 | 98 | 0.07 | 6m | LLL |
| Song2012 | superiority | DES vs DES | 34 | 32 | 0.38 | 9m | LLL |
| Xu2012 | noninferiority | DES vs DES | 200 | 192 | 0.16 | 9m | LLL |
| Gao2013 | noninferiority | DES vs DES | 227 | 231 | 0.12 | 9m | LLL |
| Lee2014 | noninferiority | DES vs DES | 245 | 255 | 0.34 | 9m | LLL |
| Remkes2014 | superiority | DES vs DES | 198 | 201 | 0.25 | 9m | MLD |
| Remkes2014 | superiority | DES vs DES | 198 | 201 | 0.26 | 9m | MLD |
| Yuan2014 | noninferiority | DES vs DES | 210 | 197 | 0.14 | 9m | LLL |
| Lemos2015 | noninferiority | DES vs DES | 132 | 62 | 0.03 | 9m | LLL |
| Windecker2015 | noninferiority | DES vs DES | 332 | 173 | 0.15 | 9m | LLL |
| Verheye2016 | noninferiority | DES vs DES | 108 | 51 | 0.19 | 6m | LLL |
| Zhang2016 | noninferiority | DES vs DES | 202 | 200 | 0.26 | 9m | LLL |
| Han2017 | noninferiority | DES vs DES | 217 | 226 | 0.10 | 9m | LLL |
| Kang2017 | noninferiority | DES vs DES | 250 | 122 | 0.31 | 9m | LLL |
| Teeuwen2017 | noninferiority | DES vs DES | 165 | 165 | 0.15 | 9m | LLL |
| Yang2017 | noninferiority | DES vs DES | 38 | 39 | 0.06 | 9m | LLL |
| Abizaid2018 | noninferiority | DES vs DES | 182 | 95 | 0.19 | 9m | LLL |
| Birgelen2018 | noninferiority | DES vs DES | 95 | 101 | 0.08 | 9m | LLL |
| Xu2018 | noninferiority | DES vs DES | 235 | 245 | 0.13 | 9m | LLL |
| Li2020 | noninferiority | DES vs DES | 254 | 251 | 0.12 | 9m | LLL |
| Lim2021 | noninferiority | DES vs DES | 57 | 55 | 0.07 | 9m | LLL |
| Sabate2021 | noninferiority | DES vs DES | 129 | 140 | 0.22 | 9m | LLL |
| Tao2021 | noninferiority | DES vs DES | 245 | 249 | 0.13 | 9m | LLL |
| Yoon2022 | noninferiority | DES vs DES | 59 | 62 | 0.07 | 9m | LLL |
|  |  |  |  |  |  |  |  |
| Gao2015 | noninferiority | BRS vs DES | 241 | 239 | 0.18 | 12m | LLL |
| Kimura2015 | noninferiority | BRS vs DES | 275 | 137 | 0.06 | 13m | LLL |
| Puricel2015 | superiority | DES vs BRS | 229 | 96 | 0.13 | 9m | LLL |
| Sabate2016 | noninferiority | BRS vs DES | 95 | 96 | 0.10 | 6m | HS |
| Serruys2016 | noninferiority | BRS vs DES | 364 | 182 | 0.18 | 36m | LLL |
| Han2018 | noninferiority | BRS vs DES | 278 | 283 | 0.12 | 12m | LLL |
| Byrne2019 | noninferiority | BRS vs DES | 173 | 89 | 0.19 | 6-8m | %DS |
| Wu2019 | noninferiority | BRS vs DES | 200 | 195 | 0.21 | 12m | LLL |
| Sabate2019 | superiority | BRS vs DES | 74 | 76 | 0.13 | 12m | the rate of increase (≥3%) |
|  |  |  |  |  |  |  |  |
| Schampaert2004 | superiority | DES vs BMS | 50 | 50 | 0.12 | 8m | MLD |
| Sabaté2005 | superiority | DES vs BMS | 111 | 110 | 0.08 | 9m | LLL |
| Kelbæk2006 | superiority | DES vs BMS | 163 | 159 | 0.09 | 6m | MLD |
| Ortolani2007 | superiority | DES vs BMS | 52 | 52 | 0.06 | 9m | LLL |
| Chan2008 | superiority | DES vs BMS | 81 | 47 | 0.06 | 6m | LLL |
| Kelbæk2008 | superiority | DES vs BMS | 313 | 313 | 0.16 | 8m | LLL |
| Herdeg2009 | superiority | DES vs BMS | 67 | 68 | 0.19 | 6m | LLL |
| Lemos2009 | superiority | DES vs BMS | 111 | 57 | 0.03 | 9m | LLL |
| Lemos2009 | superiority | DES vs BMS | 106 | 57 | 0.05 | 9m | LLL |
|  |  |  |  |  |  |  |  |
| HAUSLEITER2004 | superiority | DES vs POBA | 253 | 249 | 0.18 | 12m | Restenosis |
| Kastrati2005 | superiority | DES vs POBA | 100 | 100 | 0.08 | 6m | Restenosis |
| Kastrati2005 | superiority | DES vs POBA | 100 | 100 | 0.09 | 6m | Restenosis |
| Alfonso2006 | superiority | DES vs POBA | 76 | 74 | 0.06 | 9m | Restenosis |
|  |  |  |  |  |  |  |  |
| Park2008 | superiority | DES vs Beta-radiation-filled balloon | 65 | 64 | 0.20 | 6m | LLL |
| Song2012 | superiority | DES vs Cutting Balloon Angioplasty | 48 | 48 | 0.36 | 9m | LLL |
| With DCB arm |  |  |  |  |  |  |  |
| Chen2018 | noninferiority | DCB vs DCB | 120 | 120 | 0.13 | 9m | LLL |
| Hamm2020 | noninferiority | DCB vs DCB | 65 | 60 | 0.20 | 6m | LLL |
| Zhu2021 | noninferiority | DCB vs DCB | 110 | 106 | 0.16 | 9m | LLL |
| Hu2021 | noninferiority | DCB vs DCB | 105 | 1B6 | 0.20 | 9m | LLL |
| Jun2022 | noninferiority | DCB vs DCB | 39 | 39 | 0.23 | 6m | LLL |
| Kufner2022 | noninferiority | DCB vs DCB | 151 | 172 | 0.17 | 6-8m | %DS |
| Liu2023 | noninferiority | DCB vs DCB | 128 | 132 | 0.18 | 9m | LLL |
|  |  |  |  |  |  |  |  |
| Scheller2006 | superiority | DCB vs POBA | 26 | 26 | 0.13 | 6m | LLL |
| Rittger2012 | superiority | DCB vs POBA | 72 | 38 | 0.14 | 6m | LLL |
| Byrne2013 | superiority | DCB vs POBA | 172 | 160 | 0.17 | 6-8m | %DS |
| Kleber2016 | superiority | DCB vs POBA | 32 | 32 | 0.25 | 9m | LLL |
| Scheller2016 | superiority | DCB vs POBA | 33 | 30 | 0.14 | 6m | LLL |
| Jing2020 | superiority | DCB vs POBA | 113 | 109 | 0.22 | 9m | Target lesion stenosis |
| Qian2022 | superiority | DCB vs POBA | 188 | 88 | 0.17 | 9m | LLL |
|  |  |  |  |  |  |  |  |
| García-Touchard2017 | superiority | DCB vs BMS | 110 | 112 | 0.23 | 9m | LLL |
| Wohrle2011 | superiority | DCB+BMS vs BMS | 62 | 58 | 0.04 | 6m | LLL |
| Belkacemi2012 | superiority | DCB+BMS vs BMS | 50 | 51 | 0.17 | 6m | LLL |
| Kufner2017 | superiority | DCB+Scoring balloon vs DCB | 125 | 127 | 0.19 | 6-8m | %DS |

Abbreviation: BMS, bare mental stent; BRS, bioresorbable scaffold; DCB, drug-coated balloons; DES, drug-eluting stents; %DS, percentage diameter stenosis; HS, healing score; LLL, late lumen loss; MLD, minimal lumen diameter; POBA, plain old balloon angioplasty.1-102


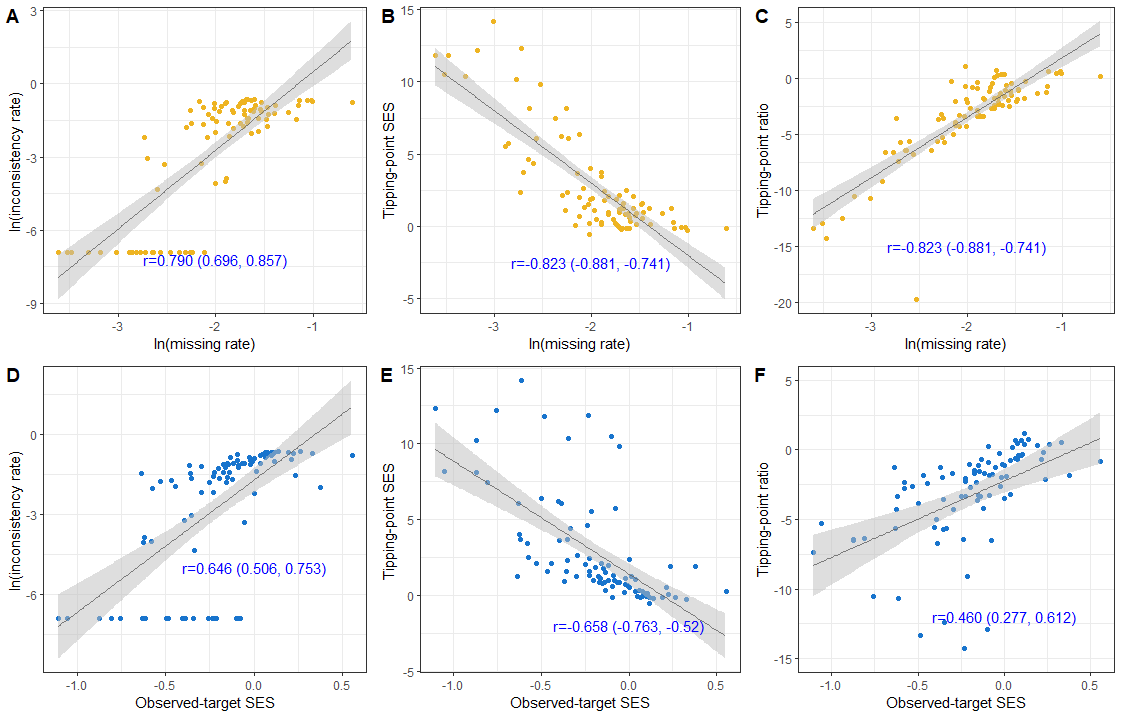
**Figure S2. Correlation analysis of missing rate with** **inconsistency rate, tipping-point SES and tipping-point ratio of the H0 rejected comparisons.**

(A) Correlation analysis between the natural logarithm of missing rate and the natural logarithm of inconsistency rate. (B) Correlation analysis between the natural logarithm of missing rate and tipping-point SES. (C) Correlation analysis between the natural logarithm of missing rate and tipping-point ratio.

Abbreviation: CI, confidence interval; SES, standardized effect size.

**Table S2. Multivariable Generalized Linear Regression analysis of study characteristics in all included studies**

| **Variables** | Inconsistency rate | | Tipping-point SES | | Tipping-point ratio | |
| --- | --- | --- | --- | --- | --- | --- |
| *β* (95%CI) | P value | *β* (95%CI) | P value | *β* (95%CI) | P value |
| Study design |  |  |  |  |  |  |
| Superiority | ref. |  | ref. |  | ref. |  |
| Noninferiority | 0.002 (-0.050, 0.053) | 0.955 | -0.187 (-0.587, 0.212) | 0.357 | 0.197 (-0.325, 0.720) | 0.459 |
| Primary endpoint |  |  |  |  |  |  |
| Other | ref. |  | ref. |  | ref. |  |
| LLL | -0.001 (-0.061, 0.059) | 0.975 | 0.004 (-0.468, 0.477) | 0.986 | 0.171 (-0.446, 0.789) | 0.586 |
| Time to primary endpoint analysis |  |  |  |  |  |  |
| ≤6m | ref. |  | ref. |  | ref. |  |
| 8m-9m | 0.032 (-0.024, 0.087) | 0.263 | -0.527 (-1.388, 0.334) | 0.230 | 0.309 (-0.763, 1.381) | 0.572 |
| ≥12m | 0.017 (-0.080, 0.114) | 0.733 | -0.619 (-2.097, 0.858) | 0.412 | 0.966 (-1.008, 2.939) | 0.337 |
| Sample size (per 100) | 0.010 (-0.000, 0.020) | 0.059 | -0.151 (-0.307, 0.005) | 0.059 | -0.176 (-0.448, 0.097) | 0.206 |
| Power | -0.002 (-0.007, 0.002) | 0.254 | -0.045 (-0.112, 0.021) | 0.180 | -0.012 (-0.101, 0.078) | 0.794 |
| 1-side alpha |  |  |  |  |  |  |
| 0.050 | ref. |  | ref. |  | ref. |  |
| 0.025 | -0.040 (-0.093, 0.014) | 0.147 | -0.197 (-0.609, 0.216) | 0.350 | 0.218 (-0.340, 0.776) | 0.443 |
| Missing rate |  |  |  |  |  |  |
| <10% | ref. |  | ref. |  | ref. |  |
| 10%-19% | 0.206 (0.145, 0.267) | <0.001 | -4.568 (-5.547, -3.589) | <0.001 | 6.291 (4.954, 7.627) | <0.001 |
| ≥20% | 0.308 (0.240, 0.376) | <0.001 | -5.044 (-6.131, -3.957) | <0.001 | 7.747 (6.284, 9.211) | <0.001 |
| Observed-target SES | 0.210 (0.133, 0.287) | <0.001 | -4.304 (-5.510, -3.099) | <0.001 | 2.007 (0.430, 3.584) | 0.013 |

Abbreviation: CI, confidence interval; SES, standardized effect size. Tipping distance= observed SES - Tipping-point SES


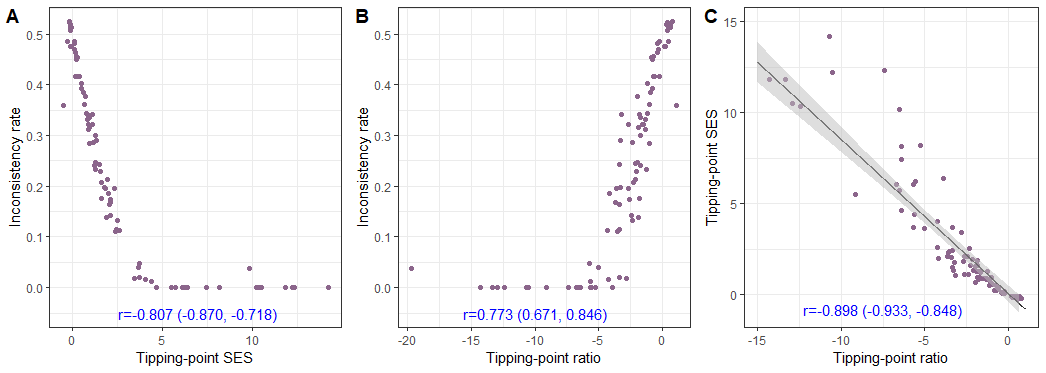


**Figure S3.** **Correlation analysis of inconsistency rate, tipping-point SES, tipping distance and tipping ratio of the H0 rejected comparisons.**

(A) Correlation analysis between inconsistency rate and tipping-point SES. (B) Correlation analysis between inconsistency rate and tipping-point ratio. (C) Correlation analysis between the tipping-point SES and the tipping-point ratio.

Abbreviation: CI, confidence interval; SES, standardized effect size.

**R code for inconsistency rate**

**#For continuous outcomes**

tp_Pri<-function(data){

N<-as.numeric(data[,6]) #the number of patients in the treatment group and control group

Nt<-as.numeric(data[,7]) #the number of patients in the treatment group

Nc<-as.numeric(data[,8]) #the number of patients in the control group

Ntf<-as.numeric(data[,9]) #the number of observed values in the treatment group

Ncf<-as.numeric(data[,10]) #the number of observed values in the control group

mar<-as.numeric(data[,16]) #margin

ENDPOINTtm1<-data[,17] #the mean of primary endpoint in the treatment group

ENDPOINTtsd<-as.numeric(data[,18]) #the SD of primary endpoint in the treatment group

ENDPOINTcm1<-data[,19] #the mean of primary endpoint in the control group

ENDPOINTcsd<-as.numeric(data[,20]) #the SD of primary endpoint in the control group

ENDPOINTtm1<-as.numeric(ENDPOINTtm1)

ENDPOINTcm1<-as.numeric(ENDPOINTcm1)

ENDPOINTtm=ENDPOINTtm1

ENDPOINTcm=ENDPOINTcm1

ENDPOINTtsd<-as.numeric(ENDPOINTtsd)

ENDPOINTcsd<-as.numeric(ENDPOINTcsd)

S=3

n.grid = 150

X_t_mis = seq.int(ENDPOINTtm - S*ENDPOINTtsd,ENDPOINTtm + S*ENDPOINTtsd, length.out = n.grid)

X_c_mis = seq.int(ENDPOINTcm - S*ENDPOINTcsd,ENDPOINTcm + S*ENDPOINTcsd, length.out = n.grid)

# t-test

Welch.t.test <- function(meanYt_mis,meanYc_mis){

Nt = Nt

Nc = Nc

N = N

mar = mar

L = length(meanYt_mis)

Ntmis = Nt-Ntf

Ntobs = Ntf

meanYobsT = ENDPOINTtm

Ncmis = Nc-Ncf

Ncobs = Ncf

meanYobsC = ENDPOINTcm

#p.val = vector(mode = "numeric", length =L)

p.val = array(NA, L)

for (i in 1:L){

d = ((meanYobsT*Ntobs + meanYt_mis[i]*Ntmis)/Nt - (meanYobsC*Ncobs + meanYc_mis[i]*Ncmis)/Nc)-mar

Vart = ((ENDPOINTtsd^2)*(Ntobs-1) + Ntobs*Ntmis/Nt*(meanYobsT - meanYt_mis[i])^2 )/(Ntobs)

Varc = ((ENDPOINTcsd^2)*(Ncobs-1) + Ncobs*Ncmis/Nc*(meanYobsC - meanYc_mis[i])^2 )/(Ncobs)

#CHECK THE DEGREES OF FREEDOM!!!

Welch.DF = (Vart/Nt + Varc/Nc)^2/((Vart/Nt)^2/(Ntobs)+(Varc/Nc)^2/(Ncobs))

t.stat = d/sqrt(Vart/Nt + Varc/Nc)

p.val[i] = 2*pt(-abs(t.stat), df=Welch.DF)

}

p.val

}

effect.size.mean = function(meanYt_mis,meanYc_mis){

((meanYt_mis*(Nt-Ntf) + ENDPOINTtm*Ntf )/Nt - (meanYc_mis*(Nc-Ncf) + ENDPOINTcm*Ncf )/Nc)-mar}

p.values <- outer(X_t_mis, X_c_mis, FUN = Welch.t.test)

theta <- outer(X_t_mis, X_c_mis, FUN = effect.size.mean)

colnames(theta) = X_c_mis

rownames(theta) = X_t_mis

df <- melt(theta)

names(df) <- c("MisYt", "MisYc", "value")

df = data.frame(df)

df$p.value = melt(p.values)[,3]

summary.type = c("density", "credible.region", "convex.hull")

alpha = 0.95

HistMeanT = NULL

HistMeanC = NULL

ind.values = FALSE

impValuesT = NA

impValuesC = NA

impValuesColor=NA

show.points = TRUE

point.size=1

point.shape=19

#### Basic plot

p <- ggplot(df, aes(x=MisYt, y=MisYc))

if (!is.null(HistMeanT)) p<-p+ geom_vline(xintercept = HistMeanT, colour = "purple", lwd = 1.01, alpha = 0.7, lty = 1)

if (!is.null(HistMeanC)) p<-p+geom_hline(yintercept = HistMeanC, colour = "purple", lwd = 1.01, alpha = 0.7, lty = 1)

p <- p + geom_tile(aes(fill = value)) + labs(title = "Treatment effect and significant p-value in red grid if any")

if(min(df$value)>0)

p <- p + scale_fill_gradient("estimate",low="white", high="orange", space="Lab")

if(max(df$value)<0)

p <- p + scale_fill_gradient("estimate",low="steelblue", high="white", space="Lab")

if(max(df$value)>0 & min(df$value)<0)

p <- p + scale_fill_gradient2("estimate",low="steelblue", high="orange", space="Lab")

if (sum(df$p.value <= 0.05) > 0) {

p <- p + geom_tile(data = subset(df, p.value <= 0.05), fill = "darkred", alpha = 0.1) + #color = "white", size = 0.1,

stat_contour(aes(z = p.value), breaks = c(0.05), color = "darkred")

}

p <- p + labs(x = "Average outcome for nonrespondents in treatment group", y = "Average outcome for nonrespondents in control group")

# Observed averages

p <- p + geom_hline(yintercept = ENDPOINTcm, colour = "darkblue", lty = 2, alpha = 0.7) +

geom_vline(xintercept = ENDPOINTtm, colour = "darkblue", lty = 2, alpha = 0.7)

# p

a1<-subset(df, value < 0)

b1<-subset(a1, p.value < 0.05)

pout1<-sprintf("%0.3f", nrow(b1)/nrow(df))

a2<-subset(df, value > 0)

b2<-subset(a2, p.value < 0.05)

pout2<-sprintf("%0.3f", nrow(b2)/nrow(df))

b3<-subset(df, p.value >= 0.05)

pout3<-sprintf("%0.3f", nrow(b3)/nrow(df))

pout<-cbind(pout1,pout2,pout3)

pout

}

**#For binary outcomes**

tp_Prig<-function(data){

N<-as.numeric(data[,6]) #the number of patients in the treatment group and control group

Nt<-as.numeric(data[,7]) #the number of patients in the treatment group

Nc<-as.numeric(data[,8]) #the number of patients in the control group

Ntf<-as.numeric(data[,9]) #the number of observed values in the treatment group

Ncf<-as.numeric(data[,10]) #the number of observed values in the control group

mar<-as.numeric(data[,16]) #margin

ENDPOINTtn1<-data[,17] #the observed event number in the treatment group

ENDPOINTcn1<-data[,19] #the observed event number in the control group

X_t_mis = seq(0,Nt-Ntf,1)

X_c_mis = seq(0,Nc-Ncf,1)

proportion.test = function(sumYt_mis,sumYc_mis, treat, Yobs){

L = length(sumYt_mis)

p.val = array(NA,L)

for (i in 1:L)

p.val[i] = prop.test(c(sumYt_mis[i] + ENDPOINTtn1,sumYc_mis[i] +ENDPOINTcn1),

c(Nt,Nc))$p.value

p.val

}

effect.size.sum = function(sumYt_mis,sumYc_mis,treat,Yobs){

(sumYt_mis + ENDPOINTtn1)/Nt -

(sumYc_mis + ENDPOINTcn1)/Nc}

p.values <- outer(X_t_mis, X_c_mis, FUN = proportion.test, treat, Yobs)

theta <- outer(X_t_mis, X_c_mis, FUN = effect.size.sum, treat, Yobs)

colnames(theta) = X_c_mis

rownames(theta) = X_t_mis

df <- melt(theta)

names(df) <- c("MisYt", "MisYc", "value")

df = data.frame(df)

df$p.value = melt(p.values)[,3]

a1<-subset(df, value < 0)

b1<-subset(a1, p.value < 0.05)

pout1<-sprintf("%0.3f", nrow(b1)/nrow(df))

a2<-subset(df, value > 0)

b2<-subset(a2, p.value < 0.05)

pout2<-sprintf("%0.3f", nrow(b2)/nrow(df))

b3<-subset(df, p.value >= 0.05)

pout3<-sprintf("%0.3f", nrow(b3)/nrow(df))

pout<-cbind(pout1,pout2,pout3)

pout

}

**References**

1. Hausleiter J, Kastrati A, Mehilli J, et al. A randomized trial comparing phosphorylcholine-coated stenting with balloon angioplasty as well as abciximab with placebo for restenosis reduction in small coronary arteries. Journal of internal medicine. 2004;256:388‐397.

2. Schampaert E, Cohen EA, Schlüter M, et al. The Canadian study of the sirolimus-eluting stent in the treatment of patients with long de novo lesions in small native coronary arteries (C-SIRIUS). Journal of the American College of Cardiology. 2004;43:1110‐1115.

3. Kastrati A, Mehilli J, von Beckerath N, et al. Sirolimus-eluting stent or paclitaxel-eluting stent vs balloon angioplasty for prevention of recurrences in patients with coronary in-stent restenosis: a randomized controlled trial. JAMA. 2005;293:165‐171.

4. Sabaté M, Jiménez-Quevedo P, Angiolillo DJ, et al. Randomized comparison of sirolimus-eluting stent versus standard stent for percutaneous coronary revascularization in diabetic patients: the diabetes and sirolimus-eluting stent (DIABETES) trial. Circulation. 2005;112:2175‐2183.

5. Alfonso F, Pérez-Vizcayno MJ, Hernandez R, et al. A randomized comparison of sirolimus-eluting stent with balloon angioplasty in patients with in-stent restenosis: results of the Restenosis Intrastent: balloon Angioplasty Versus Elective Sirolimus-Eluting Stenting (RIBS-II) trial. Journal of the American College of Cardiology. 2006;47:2152‐2160.

6. Kelbaek H, Thuesen L, Helqvist S, et al. The Stenting Coronary Arteries in Non-stress/benestent Disease (SCANDSTENT) trial. Journal of the American College of Cardiology. 2006;47:449‐455.

7. Morice MC, Colombo A, Meier B, et al. Sirolimus- vs paclitaxel-eluting stents in de novo coronary artery lesions: the REALITY trial: a randomized controlled trial. JAMA. 2006;295:895‐904.

8. Scheller B, Hehrlein C, Bocksch W, et al. Treatment of coronary in-stent restenosis with a paclitaxel-coated balloon catheter. N Engl J Med. 2006;355:2113-2124.

9. Ortolani P, Marzocchi A, Marrozzini C, et al. Randomized comparative trial of a thin-strut bare metal cobalt-chromium stent versus a sirolimus-eluting stent for coronary revascularization. Catheterization and cardiovascular interventions. 2007;69:790‐798.

10. Petronio AS, De Carlo M, Branchitta G, et al. Randomized comparison of sirolimus and paclitaxel drug-eluting stents for long lesions in the left anterior descending artery: an intravascular ultrasound study. Journal of the American College of Cardiology. 2007;49:539‐546.

11. Chan C, Zambahari R, Kaul U, et al. A randomized comparison of sirolimus-eluting versus bare metal stents in the treatment of diabetic patients with native coronary artery lesions: the DECODE study. Catheterization and cardiovascular interventions. 2008;72:591‐600.

12. Chevalier B, Di Mario C, Neumann FJ, et al. A randomized, controlled, multicenter trial to evaluate the safety and efficacy of zotarolimus- versus paclitaxel-eluting stents in de novo occlusive lesions in coronary arteries The ZoMaxx I trial. JACC Cardiovascular interventions. 2008;1:524‐532.

13. Kelbaek H, Thuesen L, Helqvist S, et al. Drug-eluting versus bare metal stents in patients with st-segment-elevation myocardial infarction: eight-month follow-up in the Drug Elution and Distal Protection in Acute Myocardial Infarction (DEDICATION) trial. Circulation. 2008;118:1155‐1162.

14. Mehilli J, Byrne RA, Wieczorek A, et al. Randomized trial of three rapamycin-eluting stents with different coating strategies for the reduction of coronary restenosis. European heart journal. 2008;29:1975‐1982.

15. Park SW, Lee SW, Koo BK, et al. Treatment of diffuse in-stent restenosis with drug-eluting stents vs. intracoronary beta-radiation therapy: INDEED Study. International journal of cardiology. 2008;131:70‐77.

16. Stone GW, Midei M, Newman W, et al. Comparison of an everolimus-eluting stent and a paclitaxel-eluting stent in patients with coronary artery disease: a randomized trial. JAMA. 2008;299:1903‐1913.

17. van der Hoeven BL, Liem SS, Jukema JW, et al. Sirolimus-eluting stents versus bare-metal stents in patients with ST-segment elevation myocardial infarction: 9-month angiographic and intravascular ultrasound results and 12-month clinical outcome results from the MISSION! Intervention Study. Journal of the American College of Cardiology. 2008;51:618‐626.

18. Chevalier B, Silber S, Park SJ, et al. Randomized comparison of the Nobori Biolimus A9-eluting coronary stent with the Taxus Liberté paclitaxel-eluting coronary stent in patients with stenosis in native coronary arteries: the NOBORI 1 trial--Phase 2. Circulation Cardiovascular interventions. 2009;2:188‐195.

19. Herdeg C, Göhring-Frischholz K, Haase KK, et al. Catheter-based delivery of fluid paclitaxel for prevention of restenosis in native coronary artery lesions after stent implantation. Circulation Cardiovascular interventions. 2009;2:294‐301.

20. Juwana YB, Suryapranata H, Ottervanger JP, et al. Comparison of rapamycin- and paclitaxel-eluting stents in patients undergoing primary percutaneous coronary intervention for ST-elevation myocardial infarction. American journal of cardiology. 2009;104:205‐209.

21. Lemos PA, Moulin B, Perin MA, et al. Randomized evaluation of two drug-eluting stents with identical metallic platform and biodegradable polymer but different agents (paclitaxel or sirolimus) compared against bare stents: 1-year results of the PAINT trial. Catheterization and cardiovascular interventions. 2009;74:665‐673.

22. Maeng M, Jensen LO, Galloe AM, et al. Comparison of the sirolimus-eluting versus paclitaxel-eluting coronary stent in patients with diabetes mellitus: the diabetes and drug-eluting stent (DiabeDES) randomized angiography trial. American journal of cardiology. 2009;103:345‐349.

23. Unverdorben M, Vallbracht C, Cremers B, et al. Paclitaxel-coated balloon catheter versus paclitaxel-coated stent for the treatment of coronary in-stent restenosis. Circulation. 2009;119:2986-2994.

24. Verheye S, Agostoni P, Dawkins KD, et al. The GENESIS (Randomized, Multicenter Study of the Pimecrolimus-Eluting and Pimecrolimus/Paclitaxel-Eluting Coronary Stent System in Patients with De Novo Lesions of the Native Coronary Arteries) trial. JACC Cardiovascular interventions. 2009;2:205‐214.

25. Ormiston JA, Abizaid A, Spertus J, et al. Six-month results of the NEVO Res-Elution I (NEVO RES-I) trial: a randomized, multicenter comparison of the NEVO sirolimus-eluting coronary stent with the TAXUS Liberté paclitaxel-eluting stent in de novo native coronary artery lesions. Circulation Cardiovascular interventions. 2010;3:556‐564.

26. Ali RM, Degenhardt R, Zambahari R, et al. Paclitaxel-eluting balloon angioplasty and cobalt-chromium stents versus conventional angioplasty and paclitaxel-eluting stents in the treatment of native coronary artery stenoses in patients with diabetes mellitus. EuroIntervention. 2011;7 Suppl K:K83‐92.

27. Desch S, Schloma D, Möbius-Winkler S, et al. Randomized comparison of a polymer-free sirolimus-eluting stent versus a polymer-based paclitaxel-eluting stent in patients with diabetes mellitus: the LIPSIA Yukon trial. JACC Cardiovascular interventions. 2011;4:452‐459.

28. Kim WJ, Lee SW, Park SW, et al. Randomized comparison of everolimus-eluting stent versus sirolimus-eluting stent implantation for de novo coronary artery disease in patients with diabetes mellitus (ESSENCE-DIABETES): results from the ESSENCE-DIABETES trial. Circulation. 2011;124:886‐892.

29. Lee CW, Park DW, Seung KB, et al. Comparison of dual drug-eluting Cilotax stent and paclitaxel-eluting Taxus Liberte stent in native coronary artery lesions. American journal of cardiology. 2011;107:990‐994.

30. Park DW, Kim YH, Song HG, et al. Comparison of everolimus- and sirolimus-eluting stents in patients with long coronary artery lesions: a randomized LONG-DES-III (Percutaneous Treatment of LONG Native Coronary Lesions With Drug-Eluting Stent-III) Trial. JACC Cardiovascular interventions. 2011;4:1096‐1103.

31. Park KW, Chae IH, Lim DS, et al. Everolimus-eluting versus sirolimus-eluting stents in patients undergoing percutaneous coronary intervention: the EXCELLENT (Efficacy of Xience/Promus Versus Cypher to Reduce Late Loss After Stenting) randomized trial. Journal of the American College of Cardiology. 2011;58:1844‐1854.

32. Pilgrim T, Räber L, Limacher A, et al. Comparison of titanium-nitride-oxide-coated stents with zotarolimus-eluting stents for coronary revascularization a randomized controlled trial. JACC Cardiovascular interventions. 2011;4:672‐682.

33. Wöhrle J, Birkemeyer R, Markovic S, et al. Prospective randomised trial evaluating a paclitaxel-coated balloon in patients treated with endothelial progenitor cell capturing stents for de novo coronary artery disease. Heart (British Cardiac Society). 2011;97:1338‐1342.

34. Xu B, Dou KF, Han YL, et al. A prospective multicenter parallel-controlled trial of TIVOLI biodegradable-polymer-based sirolimus-eluting stent compared to ENDEAVOR zotarolimus-eluting stent for the treatment of coronary artery disease: 8-month angiographic and 2-year clinical follow-up results. Chinese medical journal. 2011;124:811‐816.

35. Ahn JM, Park DW, Kim YH, et al. Comparison of resolute zotarolimus-eluting stents and sirolimus-eluting stents in patients with de novo long coronary artery lesions: a randomized LONG-DES IV trial. Circulation Cardiovascular interventions. 2012;5:633‐640.

36. Belkacemi A, Agostoni P, Nathoe HM, et al. First results of the DEB-AMI (drug eluting balloon in acute ST-segment elevation myocardial infarction) trial: a multicenter randomized comparison of drug-eluting balloon plus bare-metal stent versus bare-metal stent versus drug-eluting stent in primary percutaneous coronary intervention with 6-month angiographic, intravascular, functional, and clinical outcomes. Journal of the American College of Cardiology. 2012;59:2327‐2337.

37. Carrié D, Berland J, Verheye S, et al. A multicenter randomized trial comparing amphilimus- with paclitaxel-eluting stents in de novo native coronary artery lesions. Journal of the American College of Cardiology. 2012;59:1371‐1376.

38. Chung WY, Kang J, Cho YS, et al. A randomized, prospective, two-center comparison of sirolimus-eluting stent and zotarolimus-eluting stent in acute ST-elevation myocardial infarction: the SEZE trial. Chinese medical journal. 2012;125:3373‐3381.

39. Grube E, Chevalier B, Guagliumi G, et al. The SPIRIT V diabetic study: a randomized clinical evaluation of the XIENCE V everolimus-eluting stent vs the TAXUS Liberté paclitaxel-eluting stent in diabetic patients with de novo coronary artery lesions. American heart journal. 2012;163:867‐875.e861.

40. Latib A, Colombo A, Castriota F, et al. A randomized multicenter study comparing a paclitaxel drug-eluting balloon with a paclitaxel-eluting stent in small coronary vessels: the BELLO (Balloon Elution and Late Loss Optimization) study. Journal of the American College of Cardiology. 2012;60:2473-2480.

41. Meredith IT, Verheye S, Dubois CL, et al. Primary endpoint results of the EVOLVE trial: a randomized evaluation of a novel bioabsorbable polymer-coated, everolimus-eluting coronary stent. Journal of the American College of Cardiology. 2012;59:1362‐1370.

42. Rittger H, Brachmann J, Sinha AM, et al. A randomized, multicenter, single-blinded trial comparing paclitaxel-coated balloon angioplasty with plain balloon angioplasty in drug-eluting stent restenosis: the PEPCAD-DES study. Journal of the American College of Cardiology. 2012;59:1377-1382.

43. Song HG, Park DW, Kim YH, et al. Randomized trial of optimal treatment strategies for in-stent restenosis after drug-eluting stent implantation. Journal of the American College of Cardiology. 2012;59:1093‐1100.

44. Xu B, Dou K, Yang Y, et al. Nine-month angiographic and 2-year clinical follow-up of the NOYA biodegradable polymer sirolimus-eluting stent in the treatment of patients with de novo native coronary artery lesions: the NOYA I trial. EuroIntervention. 2012;8:796‐802.

45. Byrne RA, Neumann FJ, Mehilli J, et al. Paclitaxel-eluting balloons, paclitaxel-eluting stents, and balloon angioplasty in patients with restenosis after implantation of a drug-eluting stent (ISAR-DESIRE 3): a randomised, open-label trial. Lancet. 2013;381:461-467.

46. Gao RL, Xu B, Lansky AJ, et al. A randomised comparison of a novel abluminal groove-filled biodegradable polymer sirolimus-eluting stent with a durable polymer everolimus-eluting stent: clinical and angiographic follow-up of the TARGET I trial. EuroIntervention. 2013;9:75‐83.

47. Alfonso F, Pérez-Vizcayno MJ, Cárdenas A, et al. A Randomized Comparison of Drug-Eluting Balloon Versus Everolimus-Eluting Stent in Patients With Bare-Metal Stent–In-Stent Restenosis: The RIBS V Clinical Trial (Restenosis Intra-stent of Bare Metal Stents: Paclitaxel-eluting Balloon vs. Everolimus-eluting Stent). Journal of the American College of Cardiology. 2014;63:1378-1386.

48. Lee JY, Park DW, Kim YH, et al. Comparison of biolimus A9-eluting (Nobori) and everolimus-eluting (Promus Element) stents in patients with de novo native long coronary artery lesions: a randomized Long Drug-Eluting Stent V trial. Circulation Cardiovascular interventions. 2014;7:322‐329.

49. López Mínguez JR, Nogales Asensio JM, Doncel Vecino LJ, et al. A prospective randomised study of the paclitaxel-coated balloon catheter in bifurcated coronary lesions (BABILON trial): 24-month clinical and angiographic results. EuroIntervention. 2014;10:50‐57.

50. Poerner TC, Otto S, Gassdorf J, et al. Stent coverage and neointimal proliferation in bare metal stents postdilated with a Paclitaxel-eluting balloon versus everolimus-eluting stents: prospective randomized study using optical coherence tomography at 6-month follow-up. Circulation Cardiovascular interventions. 2014;7:760‐767.

51. Remkes WS, Somi S, Roolvink V, et al. Direct drug-eluting stenting to reduce stent restenosis: a randomized comparison of direct stent implantation to conventional stenting with pre-dilation or provisional stenting in elective PCI patients. JACC Cardiovascular interventions. 2014;7:751‐758.

52. Xu B, Gao R, Wang J, et al. A prospective, multicenter, randomized trial of paclitaxel-coated balloon versus paclitaxel-eluting stent for the treatment of drug-eluting stent in-stent restenosis: results from the PEPCAD China ISR trial. JACC Cardiovasc Interv. 2014;7:204-211.

53. Yuan F, Chen X, Song X, et al. Novel completed biodegradable polymer sirolimus-eluting stent versus durable polymer sirolimus-eluting stent in de novo lesions: nine-month angiographic and three-year clinical outcomes of HOPE trial. Chinese medical journal. 2014;127:2561‐2566.

54. Alfonso F, Perez-Vizcayno MJ, Cardenas A, et al. A Prospective Randomized Trial of Drug-Eluting Balloons Versus Everolimus-Eluting Stents in Patients With In-Stent Restenosis of Drug-Eluting Stents: The RIBS IV Randomized Clinical Trial. Journal of the American College of Cardiology. 2015;66:23-33.

55. Gao R, Yang Y, Han Y, et al. Bioresorbable Vascular Scaffolds Versus Metallic Stents in Patients With Coronary Artery Disease: ABSORB China Trial. Journal of the American College of Cardiology. 2015;66:2298-2309.

56. Kimura T, Kozuma K, Tanabe K, et al. A randomized trial evaluating everolimus-eluting Absorb bioresorbable scaffolds vs. everolimus-eluting metallic stents in patients with coronary artery disease: ABSORB Japan. Eur Heart J. 2015;36:3332-3342.

57. Lemos PA, Abizaid AA, Meireles GC, et al. Metallic Limus-Eluting Stents Abluminally Coated with Biodegradable Polymers: angiographic and Clinical Comparison of a Novel Ultra-Thin Sirolimus Stent Versus Biolimus Stent in the DESTINY Randomized Trial. Cardiovascular therapeutics. 2015;33:367‐371.

58. Puricel S, Arroyo D, Corpataux N, et al. Comparison of everolimus- and biolimus-eluting coronary stents with everolimus-eluting bioresorbable vascular scaffolds. Journal of the American College of Cardiology. 2015;65:791-801.

59. Windecker S, Haude M, Neumann FJ, et al. Comparison of a novel biodegradable polymer sirolimus-eluting stent with a durable polymer everolimus-eluting stent: results of the randomized BIOFLOW-II trial. Circulation Cardiovascular interventions. 2015;8:e001441.

60. Żurakowski A, Buszman PP, Milewski KP, et al. Stenting and Adjunctive Delivery of Paclitaxel Via Balloon Coating Versus Durable Polymeric Matrix for De Novo Coronary Lesions: clinical and Angiographic Results from the Prospective Randomized Trial. Journal of interventional cardiology. 2015;28:348‐357.

61. Kleber FX, Rittger H, Ludwig J, et al. Drug eluting balloons as stand alone procedure for coronary bifurcational lesions: results of the randomized multicenter PEPCAD-BIF trial. Clinical research in cardiology : official journal of the German Cardiac Society. 2016;105:613-621.

62. Pleva L, Kukla P, Kusnierova P, Zapletalova J, Hlinomaz O. Comparison of the Efficacy of Paclitaxel-Eluting Balloon Catheters and Everolimus-Eluting Stents in the Treatment of Coronary In-Stent Restenosis: The Treatment of In-Stent Restenosis Study. Circulation Cardiovascular interventions. 2016;9:e003316.

63. Sabaté M, Windecker S, Iñiguez A, et al. Everolimus-eluting bioresorbable stent vs. durable polymer everolimus-eluting metallic stent in patients with ST-segment elevation myocardial infarction: results of the randomized ABSORB ST-segment elevation myocardial infarction-TROFI II trial. Eur Heart J. 2016;37:229-240.

64. Scheller B, Fontaine T, Mangner N, et al. A novel drug-coated scoring balloon for the treatment of coronary in-stent restenosis: Results from the multi-center randomized controlled PATENT-C first in human trial. Catheterization and cardiovascular interventions : official journal of the Society for Cardiac Angiography & Interventions. 2016;88:51-59.

65. Serruys PW, Chevalier B, Sotomi Y, et al. Comparison of an everolimus-eluting bioresorbable scaffold with an everolimus-eluting metallic stent for the treatment of coronary artery stenosis (ABSORB II): a 3 year, randomised, controlled, single-blind, multicentre clinical trial. Lancet. 2016;388:2479-2491.

66. Stefan V, Ahmed AK, Didier C, et al. Direct implantation of rapamycin-eluting stents with bioresorbable drug carrier technology utilising the svelte coronary stent-on-a-wire: the direct II study. EuroIntervention. 2016;12:e615‐e622.

67. Zhang H, Wang X, Deng W, Wang S, Ge J, Toft E. Randomized clinical trial comparing abluminal biodegradable polymer sirolimus-eluting stents with durable polymer sirolimus-eluting stents Nine months angiographic and 5-year clinical outcomes. Medicine (united states). 2016;95.

68. Chae IH, Yoon CH, Park JJ, et al. Comparison of Drug-Eluting Balloon Followed by Bare Metal Stent with Drug-Eluting Stent for Treatment of de Novo Lesions: randomized, Controlled, Single-Center Clinical Trial. Journal of Korean medical science. 2017;32:933‐941.

69. García-Touchard A, Goicolea J, Sabaté M, et al. A randomised trial of paclitaxel-eluting balloon after bare metal stent implantation vs. bare metal stent in ST-elevation myocardial infarction (the PEBSI study). EuroIntervention. 2017;12:1587‐1594.

70. Han Y, Liu H, Yang Y, et al. A randomised comparison of biodegradable polymer- and permanent polymer-coated platinum-chromium everolimus-eluting coronary stents in China: the EVOLVE China study. EuroIntervention. 2017;13:1210‐1217.

71. Kang SH, Chung WY, Lee JM, et al. Angiographic outcomes of Orsiro biodegradable polymer sirolimus-eluting stents and Resolute Integrity durable polymer zotarolimus-eluting stents: results of the ORIENT trial. EuroIntervention. 2017;12:1623‐1631.

72. Kufner S, Joner M, Schneider S, et al. Neointimal Modification With Scoring Balloon and Efficacy of Drug-Coated Balloon Therapy in Patients With Restenosis in Drug-Eluting Coronary Stents: a Randomized Controlled Trial. JACC Cardiovascular interventions. 2017;10:1332‐1340.

73. Teeuwen K, van der Schaaf RJ, Adriaenssens T, et al. Randomized Multicenter Trial Investigating Angiographic Outcomes of Hybrid Sirolimus-Eluting Stents With Biodegradable Polymer Compared With Everolimus-Eluting Stents With Durable Polymer in Chronic Total Occlusions: the PRISON IV Trial. JACC Cardiovascular interventions. 2017;10:133‐143.

74. Yang HM, Seo KW, Yoon J, et al. Clinical and angiographic outcomes of the first Korean-made sirolimus-eluting coronary stent with abluminal bioresorbable polymer. Korean circulation journal. 2017;47:898‐906.

75. Abizaid A, Kedev S, Kedhi E, et al. Randomised comparison of a biodegradable polymer ultra-thin sirolimus-eluting stent versus a durable polymer everolimus-eluting stent in patients with de novo native coronary artery lesions: the meriT-V trial. EuroIntervention. 2018;14:e1207‐e1214.

76. Baan J, Jr., Claessen BE, Dijk KB, et al. A Randomized Comparison of Paclitaxel-Eluting Balloon Versus Everolimus-Eluting Stent for the Treatment of Any In-Stent Restenosis: The DARE Trial. JACC Cardiovasc Interv. 2018;11:275-283.

77. Chen Y, Gao L, Chen L, et al. Comparison of 2 Different Drug-Coated Balloons in In-Stent Restenosis: the RESTORE ISR China Randomized Trial. JACC: cardiovascular interventions. 2018;11:2368‐2377.

78. Han Y, Xu B, Fu G, et al. A Randomized Trial Comparing the NeoVas Sirolimus-Eluting Bioresorbable Scaffold and Metallic Everolimus-Eluting Stents. JACC Cardiovasc Interv. 2018;11:260-272.

79. Jensen CJ, Richardt G, Tölg R, et al. Angiographic and clinical performance of a paclitaxel-coated balloon compared to a second-generation sirolimus-eluting stent in patients with in-stent restenosis: the BIOLUX randomised controlled trial. EuroIntervention. 2018;14:1096‐1103.

80. Tang Y, Qiao S, Su X, et al. Drug-Coated Balloon Versus Drug-Eluting Stent for Small-Vessel Disease: The RESTORE SVD China Randomized Trial. JACC Cardiovasc Interv. 2018;11:2381-2392.

81. von Birgelen C, Asano T, Amoroso G, et al. First-in-man randomised comparison of the BuMA Supreme biodegradable polymer sirolimus-eluting stent versus a durable polymer zotarolimus-eluting coronary stent: the PIONEER trial. EuroIntervention. 2018;13:2026‐2035.

82. Wong YTA, Kang DY, Lee JB, et al. Comparison of drug-eluting stents and drug-coated balloon for the treatment of drug-eluting coronary stent restenosis: A randomized RESTORE trial. Am Heart J. 2018;197:35-42.

83. Xu K, Han Y, Xu B, et al. Efficacy and safety of a second-generation biodegradable polymer sirolimus-eluting stent: one-year results of the CREDIT 2 trial. Cardiovascular therapeutics. 2018;(no pagination).

84. Byrne RA, Alfonso F, Schneider S, et al. Prospective, randomized trial of bioresorbable scaffolds vs. everolimus-eluting stents in patients undergoing coronary stenting for myocardial infarction: the Intracoronary Scaffold Assessment a Randomized evaluation of Absorb in Myocardial Infarction (ISAR-Absorb MI) trial. European heart journal. 2019;40:167‐176.

85. Sabaté M, Alfonso F, Cequier A, et al. Magnesium-Based Resorbable Scaffold Versus Permanent Metallic Sirolimus-Eluting Stent in Patients With ST-Segment Elevation Myocardial Infarction: the MAGSTEMI Randomized Clinical Trial. Circulation. 2019;140:1904‐1916.

86. Wu Y, Shen L, Yin J, et al. Twelve-month angiographic and clinical outcomes of the XINSORB bioresorbable sirolimus-eluting scaffold and a metallic stent in patients with coronary artery disease. International journal of cardiology. 2019;293:61‐66.

87. Cortese B, Di Palma G, Guimaraes MG, et al. Drug-Coated Balloon Versus Drug-Eluting Stent for Small Coronary Vessel Disease: PICCOLETO II Randomized Clinical Trial. JACC: cardiovascular interventions. 2020;13:2840‐2849.

88. Hamm CW, Dörr O, Woehrle J, et al. A multicentre, randomised controlled clinical study of drug-coated balloons for the treatment of coronary in-stent restenosis. EuroIntervention. 2020;16:e328‐e334.

89. Jing QM, Zhao X, Han YL, et al. A drug-eluting Balloon for the trEatment of coronarY bifurcatiON lesions in the side branch: a prospective multicenter ranDomized (BEYOND) clinical trial in China. Chinese medical journal. 2020;133:899‐908.

90. Li C, Yang Y, Han Y, et al. Comparison of the Ultrathin Strut, Biodegradable Polymer Sirolimus-eluting Stent With a Durable Polymer Everolimus-eluting Stent in a Chinese Population: the Randomized BIOFLOW VI Trial. Clinical therapeutics. 2020;42:649‐660.e649.

91. Zhu J, Liu L, Zhu Z, et al. A randomized comparison of a novel iopromide-based paclitaxel-coated balloon Shenqi versus SeQuent Please for the treatment of in-stent restenosis. Coronary artery disease. 2020.

92. Hu P, Sun Y, Li CL, et al. A randomized comparison of two paclitaxel-coated balloons for the treatment of in-stent restenosis: the LONGTY ISR China randomized trial (LONGTY DCB vs. SeQuent Please DCB). Catheterization and cardiovascular interventions. 2021.

93. Lim YH, Youn JH, Hong SJ, et al. A first-in-man clinical evaluation of sirolimus and ascorbic acid-eluting stent systems: a multicenter, subject-blinded, randomized study. Korean circulation journal. 2021;51.

94. Sabaté M, Okkels Jensen L, Tilsted HH, et al. Thin- versus thick-strut polymer-free biolimus-eluting stents: the BioFreedom QCA randomised trial. EuroIntervention. 2021;17:233-239.

95. Tao L, Li Z, Yin Z, et al. Nine-month angiographic and 2-year clinical outcomes of the RECOVERY trial: a randomized study of the biodegradable polymer sirolimus-eluting COMBO dual-therapy stent versus a polymer-free sirolimus-eluting stent in Chinese patients. Catheterization and cardiovascular interventions. 2021.

96. Yu X, Wang X, Ji F, et al. A Non-inferiority, Randomized Clinical Trial Comparing Paclitaxel-Coated Balloon Versus New-Generation Drug-Eluting Stents on Angiographic Outcomes for Coronary De Novo Lesions. Cardiovascular drugs and therapy / sponsored by the International Society of Cardiovascular Pharmacotherapy. 2021.

97. Jun EJ, Shin ES, Yuan SL, et al. Comparison of 2 Different Paclitaxel-Coated Balloons in Coronary In-Stent Restenosis: A Randomized Controlled Trial. JACC Asia. 2022;2:170-179.

98. Kufner S, Rai H, Wiebe J, et al. A prospective trial of a novel low-dose paclitaxel-coated balloon therapy in patients with restenosis in drug-eluting coronary stents Intracoronary Stenting and Angiographic Results: Optimizing Treatment of Drug Eluting Stent In-stent REstenosis 3A (ISAR-DESIRE 3A). Catheterization and cardiovascular interventions : official journal of the Society for Cardiac Angiography & Interventions. 2022;99:754-762.

99. Yoon CH, Jang J, Hur SH, et al. Osstem Cardiotec Centum Stent Versus Xience Alpine Stent for De Novo Coronary Artery Lesion: A Multicenter, Randomized, Parallel-Designed, Single Blind Test. Korean Circ J. 2022;52:354-364.

100. Yu X, Wang X, Ji F, et al. A Non-inferiority, Randomized Clinical Trial Comparing Paclitaxel-Coated Balloon Versus New-Generation Drug-Eluting Stents on Angiographic Outcomes for Coronary De Novo Lesions. Cardiovasc Drugs Ther. 2022;36:655-664.

101. Liu S, Zhou Y, Shen Z, et al. A Randomized Comparison of 2 Different Drug-Coated Balloons for In-Stent Restenosis. JACC Cardiovasc Interv. 2023;16:759-767.
